# Supplementary material for: The Role of Nucleosome Positioning in the Evolution of Gene Regulation
Source: PLoS Biol. 2010 Jul 6;8(7):e1000414. doi: 10.1371/journal.pbio.1000414 (PMC2897762; doi:10.1371/journal.pbio.1000414)
Supplement: Table S1 — Chromatin features. Definitions of chromatin parameters used throughout the text. (0.03 MB XLS) [file pbio.1000414.s018.xls]

## Sheet: Sheet1
Chromatin Feature	Definition
5’NFR-ATG distance	Distance between ATG and the NFR boundary closest to the ATG (D5’NFR-ATG)
NFR length	Linker length between +1 and -1 nucleosomes
NFR occupancy	Mean normalized nucleosome occupancy over length of NFR
CDS nucleosome spacing	Median spacing between 4 adjacent nucleosomes
	(+1 through +4)
Nucleosome occupancy	Normalized number of forward and reverse reads
Nucleosome width	Forward read peak to reverse read peak distance
Nucleosome fuzziness	Weighted average of forward and reverse read cluster standard deviations
